# Supplementary material for: Oxidative Stress Protection by Canary Seed (Phalaris canariensis L.) Peptides in Caco-2 Cells and Caenorhabditis elegans
Source: MDPI journal article supplement (doi:10.3390/nu14122415), 2022-06-10
Supplement: s1 [file s1]

**Table S1. Primer sequences used.**

| <b>Primer</b>  | <b>Sequence</b>               |
|----------------|-------------------------------|
| act-1 forward  | TCCAAGAGAGGTATCCTTAC          |
| act-1 reverse  | CGGTTAGCCTTTGGATTGAG          |
| daf-16 forward | CTTCAAGCCAATGCCACTACC         |
| daf-16 reverse | GGAGATGAGTTGGATGTTGATAGC      |
| skn-1 forward  | GACGTCAATTTATGGAGTGTCG        |
| skn-1 reverse  | GAAGATGTTTTGTCGTGATCCG        |
| sod-3 forward  | CCAACCAGCGCTGAAATTCAATGG      |
| sod-3 reverse  | GGAACCGAAGTCGCGCTTAATAGT      |
| gst-4 forward  | TGG AGA CTC ATT GAC TTG GG    |
| gst-4 reverse  | TCC TTT CTT GTT GCC ACG       |
| gst-10 forward | CGT GCC ACA ACT TTA CTA CTT C |
| gst-10 reverse | CAA CTG ACC AAG GAG CAT TC    |
